# Supplementary material
Source: publisher figshare collection journal article supplement (https://gsajournals.figshare.com/ndownloader/files/23392559)
Supplement: Supplementary file 1 [file 23392559]

**

**

**Fig. S3. Purification of the CCAAT-binding complex and HapX.** **(A)** HapX, heterologously produced in *Escherichia coli*, was purified, as confirmed by SDS-polyacrylamide gel electrophoresis. **(B)** Strains containing pET28 constructs encoding Hap2, Hap3, or Hap5 were constructed. Protein production was monitored in LB medium with (+; inducing conditions) or without (–; control conditions) 1 mM IPTG for 3 h at 37°C. SDS-polyacrylamide gel electrophoresis indicated overexpression of the target protein (Hap2, Hap3, or Hap5) in the respective strain grown in the presence of 1 mM IPTG.
